# Supplementary material
Source: PubMed Central journal article supplement (PMC419644)

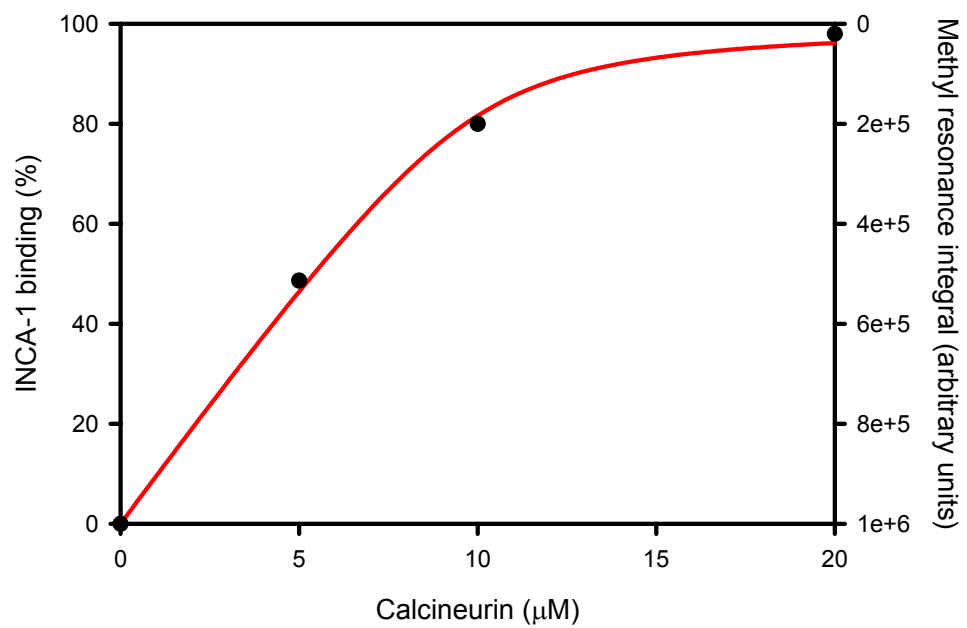

Supplement: pnas_101_20_7554__3.pdf [file pnas_101_20_7554__3.pdf]
